# Supplementary material for: Reimbursement Status and Recommendations Related to Orphan Drugs in European Countries
Source: PubMed Central journal article supplement (PMC6890830; doi:10.3389/fphar.2019.01279), 2019-11-27

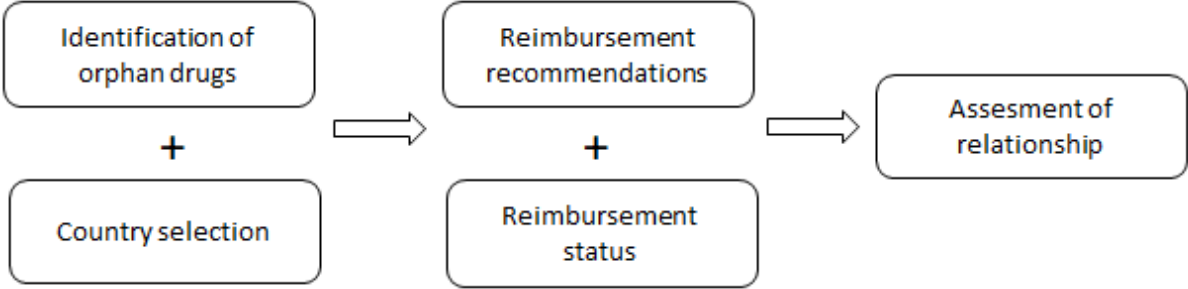

Supplement: Image_1.pdf [file Image_1.pdf]
