# Supplementary material for: Reimbursement Status and Recommendations Related to Orphan Drugs in European Countries
Source: PubMed Central journal article supplement (PMC6890830; doi:10.3389/fphar.2019.01279), 2019-11-27
Supplement: Table_1.pdf [file Table_1.pdf]

| <b>Country</b> | <b>Reimbursement recommendations – source</b>                                                                                    | <b>Reimbursement status – sources</b>                           |
|----------------|----------------------------------------------------------------------------------------------------------------------------------|-----------------------------------------------------------------|
| England        | National Institute for Health and Care Excellence (NICE)                                                                         | National Health Service Drug Tariff                             |
| France         | Transparency Committee at the French National Authority for Health (Haute Autorité de Santé, HAS)                                | Public drug database (Base de données publique des médicaments) |
| Germany        | Federal Joint Committee (Gemeinsamer Bundesausschuss, G-BA)                                                                      | -                                                               |
| Poland         | Agency for Health Technology Assessment and Tariff System in Poland (Agencja Oceny Technologii Medycznych i Taryfikacji, AOTMiT) | Announcement of Minister of Health (Ministry of Health website) |
| Scotland       | Scottish Medicines Consortium (SMC)                                                                                              | Scottish Drug Tariff                                            |
| Spain          | Health Technology Assessment Agency (Agencia de Evaluación de Tecnologías Sanitarias, AETS)                                      | Medicine Online Information Center of AEMPS                     |
| Belgium        | National Institute for Sickness and Disability Insurance (Institut national d'assurance maladie-invalidité, INAMI)               | -                                                               |
