# Supplementary material for: Reimbursement Status and Recommendations Related to Orphan Drugs in European Countries
Source: PubMed Central journal article supplement (PMC6890830; doi:10.3389/fphar.2019.01279), 2019-11-27
Supplement: Table_2.pdf [file Table_2.pdf]

| Tradename                      | Active substance           | Indication                                                                                                                                                                                                                                                                                                                                                                                                                                                                                                                                                                                                       |
|--------------------------------|----------------------------|------------------------------------------------------------------------------------------------------------------------------------------------------------------------------------------------------------------------------------------------------------------------------------------------------------------------------------------------------------------------------------------------------------------------------------------------------------------------------------------------------------------------------------------------------------------------------------------------------------------|
| ADCETRIS                       | brentuximab vedotin        | Treatment of adult patients with relapsed or refractory CD30+ Hodgkin lymphoma (HL): -following autologous stem cell transplant (ASCT) or -following at least two prior therapies when ASCT or multi-agent chemotherapy is not a treatment option. Treatment of adult patients with CD30+ HL at increased risk of relapse or progression following ASCT Treatment of adult patients with relapsed or refractory systemic anaplastic large cell lymphoma (sALCL). Treatment of adult patients with CD30+ cutaneous T-cell lymphoma (CTCL) after at least 1 prior systemic therapy.                                |
| ADEMPAS                        | riociguat                  | Treatment of adult patients with WHO Functional Class (FC) II to III with inoperable Chronic thromboembolic pulmonary hypertension (CTEPH), persistent or recurrent CTEPH after surgical treatment, to improve exercise capacity. As monotherapy or in combination with endothelin receptor antagonists, for the treatment of adult patients with pulmonary arterial hypertension (PAH) with WHO Functional Class (FC) II to III to improve exercise capacity. Efficacy has been shown in a PAH population including etiologies of idiopathic or heritable PAH or PAH associated with connective tissue disease. |
| ALOFISEL                       | darvadstrocel              | Treatment of complex perianal fistulas in adult patients with non-active/mildly active luminal Crohn's disease, when fistulas have shown an inadequate response to at least one conventional or biologic therapy. Alofisel should be used after conditioning of fistula.                                                                                                                                                                                                                                                                                                                                         |
| ALPROLIX                       | eftrenonacog alfa          | Treatment and prophylaxis of bleeding in patients with haemophilia B (congenital factor IX deficiency). ALPROLIX can be used for all age groups.                                                                                                                                                                                                                                                                                                                                                                                                                                                                 |
| ARZERRA                        | ofatumumab                 | In combination with chlorambucil or bendamustine, for the treatment of patients with chronic lymphocytic leukaemia (CLL) who have not received prior therapy and who are not eligible for fludarabine-based therapy. In combination with fludarabine and cyclophosphamide for the treatment of adult patients with relapsed CLL. Treatment of CLL in patients who are refractory to fludarabine and alemtuzumab.                                                                                                                                                                                                 |
| BAVENCIO                       | avelumab                   | As monotherapy for the treatment of adult patients with metastatic Merkel cell carcinoma (MCC).                                                                                                                                                                                                                                                                                                                                                                                                                                                                                                                  |
| BESPONSA                       | inotuzumab ozogamicin      | As monotherapy for the treatment of adults with relapsed or refractory CD22-positive B cell precursor acute lymphoblastic leukaemia (ALL). Adult patients with Philadelphia chromosome positive (Ph+) relapsed or refractory B cell precursor ALL should have failed treatment with at least 1 tyrosine kinase inhibitor (TKI).                                                                                                                                                                                                                                                                                  |
| BLINCYTO                       | blinatumomab               | Treatment of adults with Philadelphia chromosome negative relapsed or refractory B -precursor acute lymphoblastic leukaemia (ALL).                                                                                                                                                                                                                                                                                                                                                                                                                                                                               |
| BOSULIF                        | bosutinib                  | Treatment of adult patients with: - newly diagnosed chronic phase (CP) Philadelphia chromosome-positive chronic myelogenous leukaemia (Ph+ CML). - CP, accelerated phase (AP), and blast phase (BP) Ph+ CML previously treated with one or more tyrosine kinase inhibitor(s) [TKI(s)] and for whom imatinib, nilotinib and dasatinib are not considered appropriate treatment options.                                                                                                                                                                                                                           |
| BRINEURA                       | cerliponase alfa           | Treatment of neuronal ceroid lipofuscinosis type 2 (CLN2) disease, also known as tripeptidyl peptidase 1 (TPP1) deficiency.                                                                                                                                                                                                                                                                                                                                                                                                                                                                                      |
| BRONCHITOL                     | mannitol                   | Treatment of cystic fibrosis (CF) in adults aged 18 years and above as an add-on therapy to best standard of care.                                                                                                                                                                                                                                                                                                                                                                                                                                                                                               |
| CARBAGLU                       | carglumic acid             | Treatment of hyperammonaemia due to - isovaleric acidaemia, - methylmalonic acidaemia, - propionic acidaemia.                                                                                                                                                                                                                                                                                                                                                                                                                                                                                                    |
| CAYSTON                        | aztreonam                  | Suppressive therapy of chronic pulmonary infections due to Pseudomonas aeruginosa in patients with cystic fibrosis (CF) aged 6 years and older.                                                                                                                                                                                                                                                                                                                                                                                                                                                                  |
| CEPLENE                        | histamine dihydrochloride  | Maintenance therapy for adult patients with acute myeloid leukaemia in first remission concomitantly treated with interleukin-2 (IL-2). The efficacy of Ceplene has not been fully demonstrated in patients older than age 60.                                                                                                                                                                                                                                                                                                                                                                                   |
| CERDELGA                       | eliglustat                 | Long-term treatment of adult patients with Gaucher disease type 1 (GD1), who are CYP2D6 poor metabolisers (PMs), intermediate metabolisers (IMs) or extensive metabolisers (EMs)                                                                                                                                                                                                                                                                                                                                                                                                                                 |
| CHENODEOXYCHOLIC ACID LEADIANT | chenodeoxycholic acid      | Treatment of inborn errors of primary bile acid synthesis due to sterol 27 hydroxylase deficiency (presenting as cerebrotendinous xanthomatosis (CTX)) in infants, children and adolescents aged 1 month to 18 years and adults.                                                                                                                                                                                                                                                                                                                                                                                 |
| COAGADEX                       | human coagulation factor X | Treatment and prophylaxis of bleeding episodes and for perioperative management in patients with hereditary factor X deficiency.                                                                                                                                                                                                                                                                                                                                                                                                                                                                                 |
| COMETRIQ                       | cabozantinib               | Treatment of adult patients with progressive, unresectable locally advanced or metastatic medullary thyroid carcinoma. For patients in whom Rearranged during Transfection (RET) mutation status is not known or is negative, a possible lower                                                                                                                                                                                                                                                                                                                                                                   |

|                          |                                |                                                                                                                                                                                                                                                                                                                                                                                                                                                                                                                                                                                                                                                                                                                |
|--------------------------|--------------------------------|----------------------------------------------------------------------------------------------------------------------------------------------------------------------------------------------------------------------------------------------------------------------------------------------------------------------------------------------------------------------------------------------------------------------------------------------------------------------------------------------------------------------------------------------------------------------------------------------------------------------------------------------------------------------------------------------------------------|
|                          |                                | benefit should be taken into account before individual treatment decision.                                                                                                                                                                                                                                                                                                                                                                                                                                                                                                                                                                                                                                     |
| CRESEMBA                 | isavuconazole                  | In adults for the treatment of: - invasive aspergillosis - mucormycosis in patients for whom amphotericin B is inappropriate                                                                                                                                                                                                                                                                                                                                                                                                                                                                                                                                                                                   |
| CRYSVITA                 | burosumab                      | Treatment of X-linked hypophosphataemia with radiographic evidence of bone disease in children 1 year of age and older and adolescents with growing skeletons.                                                                                                                                                                                                                                                                                                                                                                                                                                                                                                                                                 |
| CYSTADROPS               | mercaptamine hydrochloride     | Treatment of corneal cystine crystal deposits in adults and children from 2 years of age with cystinosis.                                                                                                                                                                                                                                                                                                                                                                                                                                                                                                                                                                                                      |
| DACOGEN                  | decitabine                     | Treatment of adult patients aged 65 years and above with newly diagnosed de novo or secondary acute myeloid leukaemia (AML), according to the World Health Organization (WHO) classification, who are not candidates for standard induction chemotherapy.                                                                                                                                                                                                                                                                                                                                                                                                                                                      |
| DARZALEX                 | daratumumab                    | As monotherapy for the treatment of adult patients with relapsed and refractory multiple myeloma, whose prior therapy included a proteasome inhibitor and an immunomodulatory agent and who have demonstrated disease progression on the last therapy. In combination with lenalidomide and dexamethasone, or bortezomib and dexamethasone, for the treatment of adult patients with multiple myeloma who have received at least one prior therapy.                                                                                                                                                                                                                                                            |
| DEFITELIO                | defibrotide                    | Treatment of severe hepatic veno- occlusive disease (VOD) also known as sinusoidal obstructive syndrome (SOS) in haematopoietic stem-cell transplantation (HSCT) therapy. It is indicated in adults and in adolescents, children and infants over 1 month of age.                                                                                                                                                                                                                                                                                                                                                                                                                                              |
| DELTYBA                  | delamanib                      | Used as part of an appropriate combination regimen for pulmonary multi- drug resistant tuberculosis (MDR-TB) in adult patients when an effective treatment regimen cannot otherwise be composed for reasons of resistance or tolerability. Consideration should be given to official guidance on the appropriate use of antibacterial agents.                                                                                                                                                                                                                                                                                                                                                                  |
| DINUTUXIMAB BETA APEIRON | dinutuximab beta               | Treatment of high-risk neuroblastoma in patients aged 12 months and above, who have previously received induction chemotherapy and achieved at least a partial response, followed by myeloablative therapy and stem cell transplantation, as well as patients with history of relapsed or refractory neuroblastoma, with or without residual disease. Prior to the treatment of relapsed neuroblastoma, any actively progressing disease should be stabilised by other suitable measures. In patients with a history of relapsed/refractory disease and in patients who have not achieved a complete response after first line therapy, Dinutuximab beta Apeiron should be combined with interleukin-2 (IL-2). |
| ESBRIET                  | pirfenidone                    | In adults for the treatment of mild to moderate Idiopathic Pulmonary Fibrosis (IPF).                                                                                                                                                                                                                                                                                                                                                                                                                                                                                                                                                                                                                           |
| FARYDAK                  | panobinostat lactate anhydrous | In combination with bortezomib and dexamethasone, for the treatment of adult patients with relapsed and/or refractory multiple myeloma who have received at least two prior regimens including bortezomib and an immunomodulatory agent.                                                                                                                                                                                                                                                                                                                                                                                                                                                                       |
| FIRAZYR                  | icatibant acetate              | Symptomatic treatment of acute attacks of hereditary angioedema (HAE) in adults, adolescents and children aged 2 years and older, with C1-esterase- inhibitor deficiency.                                                                                                                                                                                                                                                                                                                                                                                                                                                                                                                                      |
| FIRDAPSE                 | amifampridine                  | Symptomatic treatment of Lambert-Eaton myasthenic syndrome (LEMS) in adults.                                                                                                                                                                                                                                                                                                                                                                                                                                                                                                                                                                                                                                   |
| GALAFOLD                 | migalastat                     | Long-term treatment of adults and adolescents aged 16 years and older with a confirmed diagnosis of Fabry disease ( $\alpha$ - galactosidase A deficiency) and who have an amenable mutation.                                                                                                                                                                                                                                                                                                                                                                                                                                                                                                                  |
| GAZYVARO                 | obinutuzumab                   | In combination with chlorambucil, treatment of adult patients with previously untreated chronic lymphocytic leukaemia (CLL) and with comorbidities making them unsuitable for full-dose fludarabine based therapy. In combination with chemotherapy, followed by Gazyvaro maintenance therapy in patients achieving a response is indicated for the treatment of patients with previously untreated advanced follicular lymphoma. In combination with bendamustine followed by Gazyvaro maintenance is indicated for the treatment of patients with follicular lymphoma (FL) who did not respond or who progressed during or up to 6 months after treatment with rituximab or a rituximab-containing regimen.  |
| GLYBERA                  | alipogene tiparovec            | For adult patients diagnosed with familial lipoprotein lipase deficiency (LPLD) and suffering from severe or multiple pancreatitis attacks despite dietary fat restrictions. The diagnosis of LPLD has to be confirmed by genetic testing. The indication is restricted to patients with detectable levels of LPL protein.                                                                                                                                                                                                                                                                                                                                                                                     |
| GRANUPAS                 | para-aminosalicylic acid       | Indicated for use as part of an appropriate combination regimen for multi-drug resistant tuberculosis in adults and paediatric patients from 28 days of age and                                                                                                                                                                                                                                                                                                                                                                                                                                                                                                                                                |

|                  |                                                                                  |                                                                                                                                                                                                                                                                                                                                                                                                                                                                                                                                                                                                                                   |
|------------------|----------------------------------------------------------------------------------|-----------------------------------------------------------------------------------------------------------------------------------------------------------------------------------------------------------------------------------------------------------------------------------------------------------------------------------------------------------------------------------------------------------------------------------------------------------------------------------------------------------------------------------------------------------------------------------------------------------------------------------|
|                  |                                                                                  | older when an effective treatment regimen cannot otherwise be composed for reasons of resistance or tolerability. Consideration should be given to official guidance on the appropriate use of antibacterial agents.                                                                                                                                                                                                                                                                                                                                                                                                              |
| HETLIOZ          | tasimelteon                                                                      | Treatment of Non-24-Hour Sleep-Wake Disorder (Non-24) in totally blind adults.                                                                                                                                                                                                                                                                                                                                                                                                                                                                                                                                                    |
| HOLOCLAR         | ex vivo expanded autologous human corneal epithelial cells containing stem cells | Treatment of adult patients with moderate to severe limbal stem cell deficiency (defined by the presence of superficial corneal neovascularisation in at least two corneal quadrants, with central corneal involvement, and severely impaired visual acuity), unilateral or bilateral, due to physical or chemical ocular burns. A minimum of 1 - 2 mm <sup>2</sup> of undamaged limbus is required for biopsy.                                                                                                                                                                                                                   |
| ICLUSIG          | ponatinib                                                                        | Indicated in adult patients with chronic phase, accelerated phase, or blast phase chronic myeloid leukaemia (CML) who are resistant to dasatinib or nilotinib; who are intolerant to dasatinib or nilotinib and for whom subsequent treatment with imatinib is not clinically appropriate; or who have the T315I mutation. Indicated in adult patients with Philadelphia chromosome positive acute lymphoblastic leukaemia (Ph+ ALL) who are resistant to dasatinib; who are intolerant to dasatinib and for whom subsequent treatment with imatinib is not clinically appropriate; or who have the T315I mutation.               |
| IDELVION         | albutrepenonacog alfa                                                            | Treatment and prophylaxis of bleeding in patients with haemophilia B (congenital factor IX deficiency). IDELVION can be used for all age groups.                                                                                                                                                                                                                                                                                                                                                                                                                                                                                  |
| IMBRUVICA        | ibrutinib                                                                        | As a single agent for the treatment of adult patients with relapsed or refractory mantle cell lymphoma (MCL). As a single agent for the treatment of adult patients with previously untreated chronic lymphocytic leukaemia (CLL). As a single agent or in combination with bendamustine and rituximab (BR) for the treatment of adult patients with CLL who have received at least one prior therapy. As a single agent for the treatment of adult patients with Waldenström's macroglobulinaemia (WM) who have received at least one prior therapy, or in first line treatment for patients unsuitable for chemo-immunotherapy. |
| IMNOVID          | pomalidomide                                                                     | In combination with dexamethasone, in the treatment of adult patients with relapsed and refractory multiple myeloma who have received at least two prior treatment regimens, including both lenalidomide and bortezomib, and have demonstrated disease progression on the last therapy.                                                                                                                                                                                                                                                                                                                                           |
| INOVELON         | rufinamide                                                                       | Adjunctive therapy in the treatment of seizures associated with Lennox-Gastaut syndrome in patients aged 4 years and older.                                                                                                                                                                                                                                                                                                                                                                                                                                                                                                       |
| JORVEZA          | budesonide                                                                       | Treatment of eosinophilic esophagitis (EoE) in adults (older than 18 years of age).                                                                                                                                                                                                                                                                                                                                                                                                                                                                                                                                               |
| KALYDECO         | ivacaftor                                                                        | Treatment of patients with cystic fibrosis (CF) aged 6 years and older and weighing 25kg or more who have one of the following gating (class III) mutations in the CFTR gene: G551D, G1244E, G1349D, G178R, G551S, S1251N, S1255P, S549N or S549R. Treatment of patients with cystic fibrosis (CF) aged 18 years and older who have an R117H mutation in the CFTR gene                                                                                                                                                                                                                                                            |
| KANUMA           | sebelipase alfa                                                                  | Long-term enzyme replacement therapy (ERT) in patients of all ages with lysosomal acid lipase (LAL) deficiency                                                                                                                                                                                                                                                                                                                                                                                                                                                                                                                    |
| KETOCONAZOLE HRA | ketoconazole                                                                     | Treatment of endogenous Cushing's syndrome in adults and adolescents above the age of 12 years.                                                                                                                                                                                                                                                                                                                                                                                                                                                                                                                                   |
| KOLBAM           | cholic acid                                                                      | Treatment of inborn errors in primary bile acid synthesis due to sterol 27-hydroxylase (presenting as cerebrotendinous xanthomatosis, CTX) deficiency, 2- (or $\alpha$ -) methylacyl-CoA racemase (AMACR) deficiency or cholesterol 7 $\alpha$ -hydroxylase (CYP7A1) deficiency in infants, children and adolescents aged 1 month to 18 years and adults.                                                                                                                                                                                                                                                                         |
| KUVAN            | sapropterin dihydrochloride                                                      | Treatment of hyperphenylalaninaemia (HPA) in adult and paediatric patients of all ages with phenylketonuria (PKU) who have been shown to be responsive to such treatment. Treatment of hyperphenylalaninaemia (HPA) in adult and paediatric patients with tetrahydrobiopterin (BH4) deficiency who have been shown to be responsive to such treatment.                                                                                                                                                                                                                                                                            |
| KYPROLIS         | carfilzomib                                                                      | In combination with either lenalidomide and dexamethasone or dexamethasone alone is indicated for the treatment of adult patients with multiple myeloma who have received at least one prior therapy.                                                                                                                                                                                                                                                                                                                                                                                                                             |
| LAMZEDE          | velmanase alfa                                                                   | Enzyme replacement therapy for the treatment of non-neurological manifestations in patients with mild to moderate alpha mannosidosis.                                                                                                                                                                                                                                                                                                                                                                                                                                                                                             |
| LARTRUVO         | olaratumab                                                                       | In combination with doxorubicin for the treatment of adult patients with advanced soft tissue sarcoma who are not amenable to curative treatment with surgery or radiotherapy and who have not been previously treated with doxorubicin.                                                                                                                                                                                                                                                                                                                                                                                          |

|           |                                                          |                                                                                                                                                                                                                                                                                                                                                                               |
|-----------|----------------------------------------------------------|-------------------------------------------------------------------------------------------------------------------------------------------------------------------------------------------------------------------------------------------------------------------------------------------------------------------------------------------------------------------------------|
| LEDAGA    | chlormethine                                             | Topical treatment of mycosis fungoides- type cutaneous T-cell lymphoma (MF- type CTCL) in adult patients.                                                                                                                                                                                                                                                                     |
| LENVIMA   | lenvatinib                                               | Treatment of adult patients with progressive, locally advanced or metastatic, differentiated (papillary/follicular/Hürthle cell) thyroid carcinoma (DTC) refractory to radioactive iodine (RAI).                                                                                                                                                                              |
| LUTATHERA | lutetium (177Lu) oxodotreotide                           | Treatment of unresectable or metastatic, progressive, well differentiated (G1 and G2), somatostatin receptor positive gastroenteropancreatic neuroendocrine tumours (GEP NETs) in adults.                                                                                                                                                                                     |
| LYNPARZA  | olaparib                                                 | Monotherapy for the maintenance treatment of adult patients with platinum-sensitive relapsed BRCA-mutated (germline and/or somatic) high grade serous epithelial ovarian, fallopian tube, or primary peritoneal cancer who are in response (complete response or partial response) to platinum-based chemotherapy.                                                            |
| MEPACT    | mifamurtide                                              | In children, adolescents and young adults for the treatment of high-grade resectable non-metastatic osteosarcoma after macroscopically complete surgical resection. It is used in combination with post-operative multi-agent chemotherapy. Safety and efficacy have been assessed in studies of patients 2 to 30 years of age at initial diagnosis.                          |
| MOZOBIL   | plerixafor                                               | In combination with granulocyte-colony stimulating factor G-CSF to enhance mobilisation of haematopoietic stem cells to the peripheral blood for collection and subsequent autologous transplantation in patients with lymphoma and multiple myeloma whose cells mobilise poorly.                                                                                             |
| NATPAR    | parathyroid hormone                                      | Indicated as adjunctive treatment of adult patients with chronic hypoparathyroidism who cannot be adequately controlled with standard therapy alone.                                                                                                                                                                                                                          |
| NEXAVAR   | sorafenib tosylate                                       | Treatment of patients with progressive, locally advanced or metastatic, differentiated (papillary/ follicular/Hürthle cell) thyroid carcinoma, refractory to radioactive iodine.                                                                                                                                                                                              |
| NEXOBRID  | concentrate of proteolytic enzymes enriched in bromelain | Removal of eschar in adults with deep partial- and full-thickness thermal burns.                                                                                                                                                                                                                                                                                              |
| NINLARO   | ixazomib                                                 | In combination with lenalidomide and dexamethasone is indicated for the treatment of adult patients with multiple myeloma who have received at least one prior therapy.                                                                                                                                                                                                       |
| NPLATE    | romiplostim                                              | Indicated for adult chronic immune (idiopathic) thrombocytopenic purpura (ITP) patients who are refractory to other treatments (e.g. corticosteroids, immunoglobulins)                                                                                                                                                                                                        |
| OCALIVA   | obeticholic acid                                         | Treatment of primary biliary cholangitis (also known as primary biliary cirrhosis) in combination with ursodeoxycholic acid (UDCA) in adults with an inadequate response to UDCA or as monotherapy in adults unable to tolerate UDCA.                                                                                                                                         |
| OFEV      | nintedanib                                               | Treatment in adults of Idiopathic Pulmonary Fibrosis (IPF).                                                                                                                                                                                                                                                                                                                   |
| ONIVYDE   | irinotecan hydrochloride trihydrate                      | Treatment of metastatic adenocarcinoma of the pancreas, in combination with 5-fluorouracil (5-FU) and leucovorin (LV), in adult patients who have progressed following gemcitabine based therapy.                                                                                                                                                                             |
| OPSUMIT   | macitentan                                               | Used as monotherapy or in combination, for the long-term treatment of pulmonary arterial hypertension (PAH) in adult patients of WHO Functional Class (FC) II to III. Efficacy has been shown in a PAH population including idiopathic and heritable PAH, PAH associated with connective tissue disorders, and PAH associated with corrected simple congenital heart disease. |
| ORPHACOL  | cholic acid                                              | Treatment of inborn errors in primary bile acid synthesis due to 3beta- hydroxy-delta5-C27- steroid oxidoreductase deficiency or delta4-3- oxosteroid-5beta-reductase deficiency in infants, children and adolescents aged 1 month to 18 years and adults.                                                                                                                    |
| OXERVATE  | cenegermin                                               | Treatment of moderate (persistent epithelial defect) or severe (corneal ulcer) neurotrophic keratitis in adults.                                                                                                                                                                                                                                                              |
| PEYONA    | caffeine citrate                                         | Treatment of primary apnea of premature newborns.                                                                                                                                                                                                                                                                                                                             |
| PLENADREN | hydrocortisone                                           | Treatment of adrenal insufficiency in adults.                                                                                                                                                                                                                                                                                                                                 |
| PREVYMIS  | letermovir                                               | Prophylaxis of cytomegalovirus (CMV) reactivation and disease in adult CMV-seropositive recipients [R+] of an allogeneic haematopoietic stem cell transplant (HSCT). Consideration should be given to official guidance on the appropriate use of antiviral agents.                                                                                                           |

|             |                                                                                                          |                                                                                                                                                                                                                                                                                                                                                                                                                                                                                                                                                                                                                                                                                                                                                     |
|-------------|----------------------------------------------------------------------------------------------------------|-----------------------------------------------------------------------------------------------------------------------------------------------------------------------------------------------------------------------------------------------------------------------------------------------------------------------------------------------------------------------------------------------------------------------------------------------------------------------------------------------------------------------------------------------------------------------------------------------------------------------------------------------------------------------------------------------------------------------------------------------------|
| PROCYSBI    | mercaptamine                                                                                             | Treatment of proven nephropathic cystinosis. Cysteamine reduces cystine accumulation in some cells (e.g. leukocytes, muscle and liver cells) of nephropathic cystinosis patients and, when treatment is started early, it delays the development of renal failure.                                                                                                                                                                                                                                                                                                                                                                                                                                                                                  |
| RAVICTI     | glycerol phenylbutyrate                                                                                  | Indicated for use as adjunctive therapy for chronic management of adult and paediatric patients $\geq 2$ months of age with urea cycle disorders (UCDs) including: deficiencies of carbamoyl phosphate- synthase-I (CPS) -ornithine carbamoyltransferase (OTC) - argininosuccinate synthetase (ASS), - argininosuccinate lyase (ASL) - arginase I (ARG) - ornithine translocase deficiency hyperornithinaemia -hyperammonaemia homocitrullinuria syndrome (HHH) Who cannot be managed by dietary protein restriction and/or amino acid supplementation alone. RAVICTI must be used with dietary protein restriction and, in some cases, dietary supplements (e.g., essential amino acids, arginine, citrulline, protein- free calorie supplements). |
| RAXONE      | idebenone                                                                                                | Treatment of visual impairment in adolescent and adult patients with Leber's Hereditary Optic Neuropathy (LHON).                                                                                                                                                                                                                                                                                                                                                                                                                                                                                                                                                                                                                                    |
| REVESTIVE   | teduglutide                                                                                              | Treatment of patients aged 1 year and above with Short Bowel Syndrome. Patients should be stable following a period of intestinal adaptation after surgery.                                                                                                                                                                                                                                                                                                                                                                                                                                                                                                                                                                                         |
| REVLIMID    | lenalidomide                                                                                             | Treatment of patients with transfusion- dependent anaemia due to low-or intermediate-1-risk myelodysplastic syndromes associated with an isolated deletion 5q cytogenetic abnormality when other therapeutic options are insufficient or inadequate. Treatment of adult patients with relapsed or refractory mantle cell lymphoma.                                                                                                                                                                                                                                                                                                                                                                                                                  |
| RYDAPT      | midostaurin                                                                                              | In combination with standard daunorubicin and cytarabine induction and high dose cytarabine consolidation chemotherapy, and for patients in complete response followed by Rydapt single agent maintenance therapy, for adult patients with newly diagnosed acute myeloid leukaemia (AML) who are FLT3 mutation positive. As monotherapy for the treatment of adult patients with aggressive systemic mastocytosis (ASM), systemic mastocytosis with associated haematological neoplasm (SM AHN), or mast cell leukaemia (MCL).                                                                                                                                                                                                                      |
| SCENESSE    | afamelanotide                                                                                            | Prevention of phototoxicity in adult patients with erythropoietic protoporphyria (EPP)                                                                                                                                                                                                                                                                                                                                                                                                                                                                                                                                                                                                                                                              |
| SIGNIFOR    | pasireotide                                                                                              | Treatment of adult patients with Cushing's disease for whom surgery is not an option or for whom surgery has failed. Treatment of adult patients with acromegaly for whom surgery is not an option or has not been curative and who are inadequately controlled on treatment with another somatostatin analogue.                                                                                                                                                                                                                                                                                                                                                                                                                                    |
| SIRTURO     | bedaquiline                                                                                              | Used as part of an appropriate combination regimen for pulmonary multidrug-resistant tuberculosis (MDR-TB) in adult patients when an effective treatment regimen cannot otherwise be composed for reasons of resistance or tolerability. Consideration should be given to official guidance on the appropriate use of antibacterial agents.                                                                                                                                                                                                                                                                                                                                                                                                         |
| SOLIRIS     | eculizumab                                                                                               | Treatment of adults and children with : - Paroxysmal nocturnal haemoglobinuria (PNH). Evidence of clinical benefit is demonstrated in patients with haemolysis with clinical symptom(s) indicative of high disease activity, regardless of transfusion history. - atypical haemolytic uraemic syndrome (aHUS). -Refractory generalized myasthenia gravis (gMG) in patients who are anti-acetylcholine receptor (AChR) antibody-positive                                                                                                                                                                                                                                                                                                             |
| SOMAKIT TOC | edotreotide                                                                                              | After radiolabelling with gallium (68Ga) chloride solution, the solution of gallium (68Ga) edotreotide obtained is indicated for Positron Emission Tomography (PET) imaging of somatostatin receptor overexpression in adult patients with confirmed or suspected well-differentiated gastro-enteropancreatic neuroendocrine tumours (GEP-NET) for localizing primary tumours and their metastases.                                                                                                                                                                                                                                                                                                                                                 |
| SPINRAZA    | nusinersen sodium                                                                                        | Treatment of 5q Spinal Muscular Atrophy.                                                                                                                                                                                                                                                                                                                                                                                                                                                                                                                                                                                                                                                                                                            |
| STRENSIQ    | asfotase alfa                                                                                            | Long-term enzyme replacement therapy in patients with paediatric-onset hypophosphatasia to treat the bone manifestations of the disease.                                                                                                                                                                                                                                                                                                                                                                                                                                                                                                                                                                                                            |
| STRIMVELIS  | autologous CD34+ enriched cell fraction that contains CD34+ cells transduced with retroviral vector that | Treatment of patients with severe combined immunodeficiency due to adenosine deaminase deficiency (ADA-SCID), for whom no suitable human leukocyte antigen (HLA)-matched related stem cell donor is available.                                                                                                                                                                                                                                                                                                                                                                                                                                                                                                                                      |

|                     |                                                                                                                       |                                                                                                                                                                                                                                                                                                                                                                                                                                                                                                                                                                                                                                                       |
|---------------------|-----------------------------------------------------------------------------------------------------------------------|-------------------------------------------------------------------------------------------------------------------------------------------------------------------------------------------------------------------------------------------------------------------------------------------------------------------------------------------------------------------------------------------------------------------------------------------------------------------------------------------------------------------------------------------------------------------------------------------------------------------------------------------------------|
|                     | encodes for the human adenosine deaminase (ADA) cDNA sequence from human haematopoietic stem/progenitor (CD34+) cells |                                                                                                                                                                                                                                                                                                                                                                                                                                                                                                                                                                                                                                                       |
| SYLVANT             | siltuximab                                                                                                            | Treatment of adult patients with multicentric Castleman's disease (MCD) who are human immunodeficiency virus (HIV) negative and human herpesvirus-8 (HHV-8) negative.                                                                                                                                                                                                                                                                                                                                                                                                                                                                                 |
| TASIGNA             | nilotinib                                                                                                             | Treatment of adult and paediatric patients with newly diagnosed Philadelphia chromosome positive chronic myelogenous leukaemia (CML) in the chronic phase. Adult patients with chronic phase and accelerated phase Philadelphia chromosome positive CML with resistance or intolerance to prior therapy including imatinib. Efficacy data in patients with CML in blast crisis are not available. Paediatric patients with chronic phase Philadelphia chromosome positive CML with resistance or intolerance to prior therapy including imatinib.                                                                                                     |
| TEPADINA            | thiotepa                                                                                                              | In combination with other chemotherapy medicinal products: 1) with or without total body irradiation (TBI), as conditioning treatment prior to allogeneic or autologous haematopoietic progenitor cell transplantation (HPCT) in haematological diseases in adult and paediatric patients; 2) when high dose chemotherapy with HPCT support is appropriate for the treatment of solid tumours in adult and paediatric patients.                                                                                                                                                                                                                       |
| THALIDOMIDE CELGENE | thalidomide                                                                                                           | In combination with melphalan and prednisone as first line treatment of patients with untreated multiple myeloma, aged $\geq 65$ years or ineligible for high dose chemotherapy. Thalidomide Celgene is prescribed and dispensed according to the Thalidomide Celgene Pregnancy Prevention Programme                                                                                                                                                                                                                                                                                                                                                  |
| TOBI PODHALER       | tobramycin                                                                                                            | Suppressive therapy of chronic pulmonary infection due to <i>Pseudomonas aeruginosa</i> in adults and children aged 6 years and older with cystic fibrosis. Consideration should be given to official guidance on the appropriate use of antibacterial agents.                                                                                                                                                                                                                                                                                                                                                                                        |
| TORISEL             | temsirolimus                                                                                                          | Treatment of adult patients with relapsed and / or refractory mantle cell lymphoma (MCL).                                                                                                                                                                                                                                                                                                                                                                                                                                                                                                                                                             |
| TRANSLARNA          | ataluren                                                                                                              | Treatment of Duchenne muscular dystrophy resulting from a nonsense mutation in the dystrophin gene, in ambulatory patients aged 5 years and older. Efficacy has not been demonstrated in non-ambulatory patients. The presence of a nonsense mutation in the dystrophin gene should be determined by genetic testing.                                                                                                                                                                                                                                                                                                                                 |
| VENCLYXTO           | venetoclax                                                                                                            | As monotherapy for the treatment of chronic lymphocytic leukaemia (CLL) in the presence of 17p deletion or TP53 Mutation in adult patients who are unsuitable for or have failed a B-cell receptor pathway inhibitor. As monotherapy for the treatment of CLL in the absence of 17p deletion or TP53 mutation in adult patients who have failed both chemoimmunotherapy and a B-cell receptor pathway inhibitor.                                                                                                                                                                                                                                      |
| VIDAZA              | azacitidine                                                                                                           | Treatment of adult patients who are not eligible for haematopoietic stem cell transplantation with: - intermediate-2 and high-risk myelodysplastic syndromes (MDS) according to the International Prognostic Scoring System (IPSS), - chronic myelomonocytic leukaemia (CMML) with 10-29% marrow blasts without myeloproliferative disorder, - acute myeloid leukaemia (AML) with 20- 30 % blasts and multi-lineage dysplasia, according to World Health Organisation (WHO) classification. Treatment of adult patients aged 65 years or older who are not eligible for HSCT with AML with $>30\%$ marrow blasts according to the WHO classification. |
| VIMIZIM             | elosulfase alfa                                                                                                       | Treatment of mucopolysaccharidosis, type IVA (Morquio A Syndrome, MPS IVA) in patients of all ages.                                                                                                                                                                                                                                                                                                                                                                                                                                                                                                                                                   |
| VOLIBRIS            | ambrisentan                                                                                                           | Treatment of pulmonary arterial hypertension (PAH) in adult patients of WHO Functional Class (FC) II to III, including use in combination treatment. Efficacy has been shown in idiopathic PAH (IPAH) and in PAH associated with connective tissue disease.                                                                                                                                                                                                                                                                                                                                                                                           |
| VOTUBIA             | everolimus                                                                                                            | Treatment of adult patients with renal angiomyolipoma associated with tuberous sclerosis complex (TSC) who are at risk of complications (based on factors such as tumour size or presence of aneurysm, or presence of multiple or bilateral tumours) but who do not require immediate surgery. The evidence is based on analysis of                                                                                                                                                                                                                                                                                                                   |

|            |                                                                                                                                                                                                                                       |                                                                                                                                                                                                                                                                                                                                                                                                        |
|------------|---------------------------------------------------------------------------------------------------------------------------------------------------------------------------------------------------------------------------------------|--------------------------------------------------------------------------------------------------------------------------------------------------------------------------------------------------------------------------------------------------------------------------------------------------------------------------------------------------------------------------------------------------------|
|            |                                                                                                                                                                                                                                       | change in sum of angiomyolipoma volume. Treatment of patients with subependymal giant cell astrocytoma (SEGA) associated with tuberous sclerosis complex (TSC) who require therapeutic intervention but are not amenable to surgery. The evidence is based on analysis of change in SEGA volume. Further clinical benefit, such as improvement in disease-related symptoms, has not been demonstrated. |
| VPRIV      | velaglucerase alfa                                                                                                                                                                                                                    | Long-term enzyme replacement therapy (ERT) in patients with type 1 Gaucher disease.                                                                                                                                                                                                                                                                                                                    |
| VYNDAQEL   | tafamidis                                                                                                                                                                                                                             | Treatment of transthyretin amyloidosis in adult patients with stage 1 symptomatic polyneuropathy to delay peripheral neurologic impairment.                                                                                                                                                                                                                                                            |
| WAKIX      | pitolisant                                                                                                                                                                                                                            | Treatment in adults of narcolepsy with or without cataplexy.                                                                                                                                                                                                                                                                                                                                           |
| XALUPRINE  | mercaptopurine                                                                                                                                                                                                                        | Treatment of acute lymphoblastic leukaemia (ALL) in adults, adolescents and children.                                                                                                                                                                                                                                                                                                                  |
| XERMELO    | telotristat                                                                                                                                                                                                                           | Treatment of carcinoid syndrome diarrhoea in combination with somatostatin analogue (SSA) therapy in adults inadequately controlled by SSA therapy.                                                                                                                                                                                                                                                    |
| YONDELIS   | trabectedin                                                                                                                                                                                                                           | In combination with pegylated liposomal doxorubicin (PLD), treatment of patients with relapsed platinum-sensitive ovarian cancer.                                                                                                                                                                                                                                                                      |
| ZALMOXIS   | allogeneic T cells genetically modified with a retroviral vector encoding for a truncated form of the human low affinity nerve growth factor receptor ( $\Delta$ LNGFR) and the herpes simplex I virus thymidine kinase (HSV-TK Mut2) | Indicated as adjunctive treatment in haploidentical haematopoietic stem cell transplantation (HSCT) of adult patients with high-risk haematological malignancies.                                                                                                                                                                                                                                      |
| ZAVESCA    | miglustat                                                                                                                                                                                                                             | Treatment of progressive neurological manifestations in adult patients and paediatric patients with Niemann-Pick type C disease.                                                                                                                                                                                                                                                                       |
| ZEJULA     | niraparib                                                                                                                                                                                                                             | As monotherapy for the maintenance treatment of adult patients with platinum sensitive relapsed high grade serous epithelial ovarian, fallopian tube, or primary peritoneal cancer who are in response (complete or partial) to platinum based chemotherapy.                                                                                                                                           |
| JAKAVI     | ruxolitinib                                                                                                                                                                                                                           | Treatment of chronic idiopathic myelofibrosis. Treatment of myelofibrosis secondary to polycythaemia vera or essential thrombocythaemia                                                                                                                                                                                                                                                                |
| SUTENT     | sunitinib                                                                                                                                                                                                                             | Treatment of malignant gastrointestinal stromal tumours. Treatment of renal cell carcinoma                                                                                                                                                                                                                                                                                                             |
| EVOLTRA    | clofarabine                                                                                                                                                                                                                           | Treatment of acute lymphoblastic leukaemia                                                                                                                                                                                                                                                                                                                                                             |
| UPTRAVI    | selexipag                                                                                                                                                                                                                             | Treatment of pulmonary arterial hypertension and chronic thromboembolic pulmonary hypertension                                                                                                                                                                                                                                                                                                         |
| LUMACAFTOR | lumacaftor                                                                                                                                                                                                                            | Treatment of cystic fibrosis                                                                                                                                                                                                                                                                                                                                                                           |
| EXJADE     | deferasirox                                                                                                                                                                                                                           | Treatment of chronic iron overload requiring chelation therapy                                                                                                                                                                                                                                                                                                                                         |
| GLIOLAN    | 5-Aminolevulinic acid hydrochloride                                                                                                                                                                                                   | Intra-operative photodynamic diagnosis of residual glioma                                                                                                                                                                                                                                                                                                                                              |
| REPLAGAL   | Alpha-galactosidase A                                                                                                                                                                                                                 | Treatment of Fabry disease                                                                                                                                                                                                                                                                                                                                                                             |
| FABRAZYME  | Alpha-galactosidase A                                                                                                                                                                                                                 | Treatment of Fabry disease                                                                                                                                                                                                                                                                                                                                                                             |
| XAGRID     | Anagrelide hydrochloride                                                                                                                                                                                                              | Treatment of essential thrombocythaemia                                                                                                                                                                                                                                                                                                                                                                |
| TRISENOX   | Arsenic trioxide                                                                                                                                                                                                                      | Treatment of acute promyelocytic leukaemia                                                                                                                                                                                                                                                                                                                                                             |
| LYMPREVA   | Autologous tumor-derived immunoglobulin idiotype coupled to keyhole limpet                                                                                                                                                            | Treatment of follicular lymphoma                                                                                                                                                                                                                                                                                                                                                                       |

|            |                                                                                                                                                                        |                                                                                                                                                                                                                                                                                                                                  |
|------------|------------------------------------------------------------------------------------------------------------------------------------------------------------------------|----------------------------------------------------------------------------------------------------------------------------------------------------------------------------------------------------------------------------------------------------------------------------------------------------------------------------------|
|            | haemocyanin                                                                                                                                                            |                                                                                                                                                                                                                                                                                                                                  |
| INLYTA     | Axitinib                                                                                                                                                               | Treatment of renal-cell carcinoma                                                                                                                                                                                                                                                                                                |
| CYSTADANE  | Betaine anhydrous                                                                                                                                                      | Treatment of homocystinuria                                                                                                                                                                                                                                                                                                      |
| TRACLEER   | Bosentan                                                                                                                                                               | Treatment of pulmonary arterial hypertension and chronic thromboembolic pulmonary hypertension. Treatment of systemic sclerosis (scleroderma)                                                                                                                                                                                    |
| BUSILVEX   | Busulfan                                                                                                                                                               | Conditioning treatment prior to haematopoietic-progenitor-cell transplantation                                                                                                                                                                                                                                                   |
| ONSENAL    | Celecoxib                                                                                                                                                              | Treatment of familial adenomatous polyposis (FAP)                                                                                                                                                                                                                                                                                |
| UNITUXIN   | Chimeric monoclonal antibody against GD2(dinutuximab)                                                                                                                  | Treatment of neuroblastoma                                                                                                                                                                                                                                                                                                       |
| VERKAZIA   | Ciclosporin                                                                                                                                                            | Treatment of vernal keratoconjunctivitis                                                                                                                                                                                                                                                                                         |
| LITAK      | Cladribine                                                                                                                                                             | Treatment of indolent non-Hodgkin's lymphoma                                                                                                                                                                                                                                                                                     |
| DROPCYS    | Cysteamine hydrochloride                                                                                                                                               | Treatment of cystinosis                                                                                                                                                                                                                                                                                                          |
| SPRYCEL    | Dasatinib                                                                                                                                                              | Treatment of acute lymphoblastic leukaemia. Treatment of chronic myeloid leukaemia                                                                                                                                                                                                                                               |
| NEOFORDEX  | Dexamethasone (40 mg tablet)                                                                                                                                           | Treatment of multiple myeloma                                                                                                                                                                                                                                                                                                    |
| SAVENE     | Dexrazoxane                                                                                                                                                            | Treatment of anthracycline extravasations                                                                                                                                                                                                                                                                                        |
| REVOLADE   | Eltrombopag olamine                                                                                                                                                    | Treatment of idiopathic thrombocytopenic purpura                                                                                                                                                                                                                                                                                 |
| AFINITOR   | Everolimus                                                                                                                                                             | Treatment of renal cell carcinoma                                                                                                                                                                                                                                                                                                |
| NEOCEPRI   | Folic acid to be used with N-[4-[[[(2-amino-3,4-dihydro-4-oxo-6-pteridinyl)methyl]amino]benzoyl]-D-gamma-glutamyl-(2S)-2-amino-beta-alanyl-L-alpha-aspartyl-L-cysteine | Diagnosis of positive folate-receptor status in ovarian cancer                                                                                                                                                                                                                                                                   |
| SIKLOS     | Hydroxyurea                                                                                                                                                            | Treatment of sickle cell syndrome                                                                                                                                                                                                                                                                                                |
| PEDEA      | Ibuprofen                                                                                                                                                              | Treatment of patent ductus arteriosus                                                                                                                                                                                                                                                                                            |
| ELAPRASE   | Iduronate-2-sulfatase                                                                                                                                                  | Treatment of mucopolysaccharidosis, type II (Hunter Syndrome)                                                                                                                                                                                                                                                                    |
| VENTAVIS   | Iloprost                                                                                                                                                               | Treatment of primary and of the following forms of secondary pulmonary hypertension...                                                                                                                                                                                                                                           |
| GLIVEC     | Imatinib mesilate                                                                                                                                                      | Treatment of dermatofibrosarcoma protuberans Treatment of acute lymphoblastic leukaemia Treatment of chronic eosinophilic leukaemia and the hypereosinophilic syndrome Treatment of chronic myeloid leukaemia Treatment of malignant gastrointestinal stromal tumours Treatment of myelodysplastic / myeloproliferative diseases |
| ALDURAZYME | Iaronidase                                                                                                                                                             | Treatment of mucopolysaccharidosis type I                                                                                                                                                                                                                                                                                        |
| ORKAMBI    | Lumacaftor / ivacaftor                                                                                                                                                 | Treatment of cystic fibrosis                                                                                                                                                                                                                                                                                                     |
| INCRELEX   | Mecasermin                                                                                                                                                             | Treatment of primary insulin-like growth factor-1 deficiency due to molecular or genetic defects                                                                                                                                                                                                                                 |
| CORLUXIN   | Mifepristone                                                                                                                                                           | Treatment of hypercortisolism (Cushing's syndrome) of endogenous origin                                                                                                                                                                                                                                                          |
| LYSODREN   | Mitotane                                                                                                                                                               | Treatment of adrenal cortical carcinoma                                                                                                                                                                                                                                                                                          |
| FOLCEPRI   | etarfolatide                                                                                                                                                           | Diagnosis of positive folate-receptor status in ovarian cancer                                                                                                                                                                                                                                                                   |
| NAGLAZYME  | galsulfase                                                                                                                                                             | Treatment of mucopolysaccharidosis VI (MPS VI) or Maroteaux-Lamy syndrome                                                                                                                                                                                                                                                        |
| ATRIANCE   | Nelarabine                                                                                                                                                             | Treatment of acute lymphoblastic leukaemia                                                                                                                                                                                                                                                                                       |
| ORFADIN    | Nitisinone                                                                                                                                                             | Treatment of tyrosinaemia type 1                                                                                                                                                                                                                                                                                                 |



|                         |                                                              |                                                                                                |
|-------------------------|--------------------------------------------------------------|------------------------------------------------------------------------------------------------|
| SOMAVERT                | Pegvisomant                                                  | Treatment of acromegaly                                                                        |
| PHOTOBARR               | Porfimer sodium<br>(for use with<br>photodynamic<br>therapy) | Treatment of high-grade dysplasia in Barrett's oesophagus                                      |
| CYRAMZA                 | Ramucirumab                                                  | treatment of gastric cancer                                                                    |
| ELOCTA                  | efmoroctocog alfa                                            | Treatment of haemophilia A                                                                     |
| MYOZYME                 | alglucosidase alfa                                           | Treatment of glycogen storage disease type II (Pompe's disease)                                |
| NOVOTHIRTEEN            | catridecacog                                                 | Treatment of hereditary factor-XIII deficiency                                                 |
| ILARIS                  | canakinumab                                                  | Treatment of cryopirin-associated periodic syndromes (FCUS, MWS, and NOMID)                    |
| OBIZUR                  | susoctocog alfa                                              | Treatment of haemophilia A                                                                     |
| RILONACEPT<br>REGENERON | Rilonacept                                                   | Treatment of cryopirin-associated periodic syndromes                                           |
| RUBRACA                 | Rucaparib                                                    | Treatment of ovarian cancer                                                                    |
| REVATIO                 | Sildenafil citrate                                           | Treatment of pulmonary arterial hypertension and chronic thromboembolic pulmonary hypertension |
| THELIN                  | Sitaxentan sodium                                            | Treatment of pulmonary arterial hypertension and chronic thromboembolic pulmonary hypertension |
| XYREM                   | Sodium oxybate                                               | Treatment of narcolepsy                                                                        |
| DIACOMIT                | Stiripentol                                                  | Treatment of severe myoclonic epilepsy in infancy                                              |
| DIACOMIT                | vintafolide                                                  | Treatment of severe myoclonic epilepsy in infancy                                              |
| PRIALT                  | Ziconotide<br>(intraspinal use)                              | Treatment of chronic pain requiring intraspinal analgesia                                      |
| WILZIN                  | Zinc acetate<br>dihydrate                                    | Treatment of Wilson's disease                                                                  |
